# Supplementary material for: Development and application of a cloud point method for the extraction of natural estrogens E1 and E2 from urine samples and their simultaneous determination by HPLC-EC using a BDD electrode
Source: Royal Society of Chemistry journal article supplement (doi:10.1039/c7ay00047b), 2017-01-01
Supplement: c7ay00047b1.pdf [file c7ay00047b1.pdf]

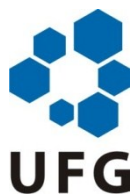

UNIVERSIDADE FEDERAL DE GOIÁS  
(Regional Catalão)

Physics and Chemistry Institute  
Catalão-GO, Brazil

phone: +55 (64) 3441-5334 fax: +55 (64) 3351-5300

email: ls\_andrade@ufg.br

Manuscript “**Development and application of a cloud point method for the extraction of the natural estrogens E1 and E2 from urine samples and their simultaneous determination by HPLC-EC using BDD electrode**”, by K. P. de Amorim & L.S. Andrade.

### Supplementary Material

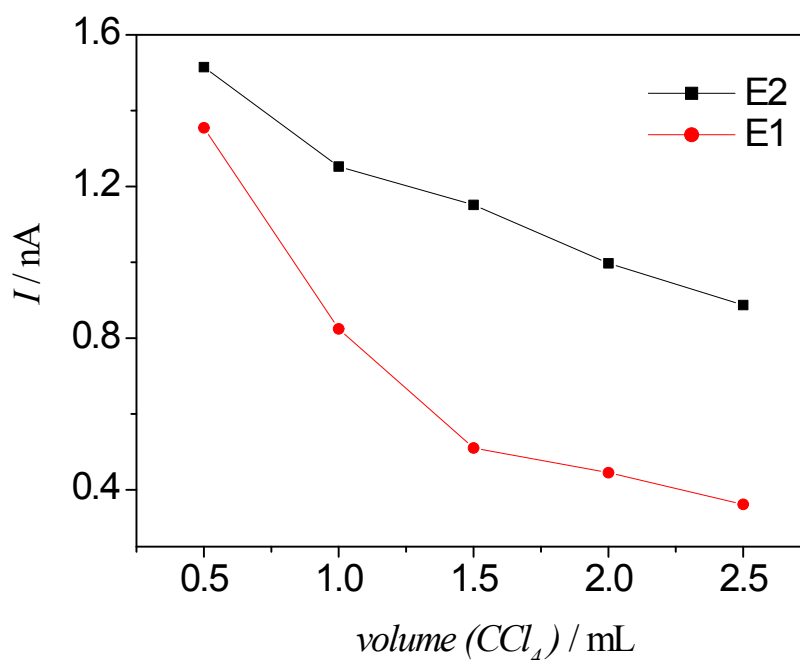

Figure. Current signal response obtained in the electrochemical detection of E1 and E2 ( $500 \text{ ng mL}^{-1}$ ) *versus* extracting solvent volume ( $\text{CCl}_4$ ). The chromatograph and electrochemical conditions are the same showed in Fig. 2 legend.
